RESEARCH ARTICLE

# Low-dose ionizing radiation exposure represses the cell cycle and protein synthesis pathways in *in vitro* human primary keratinocytes and U937 cell lines

Kazumasa Sekihara<sup>1,2\*</sup>, Kaori Saitoh<sup>1</sup>, Haeun Yang<sup>1,2</sup>, Haruki Kawashima<sup>3</sup>, Saiko Kazuno<sup>4</sup>, Mika Kikkawa<sup>4</sup>, Hajime Arai<sup>4</sup>, Takashi Miida<sup>1</sup>, Nobuhiro Hayashi<sup>3</sup>, Keisuke Sasai<sup>5</sup>, Yoko Tabe<sup>1,6\*</sup>

**1** Department of Laboratory Medicine, Juntendo University Graduate School of Medicine, Tokyo, Japan, **2** Leading Center for the Development and Research of Cancer Medicine, Juntendo University Graduate School of Medicine, Tokyo, Japan, **3** Department of Life Science and Technology, Tokyo Institute of Technology Graduate School of Bioscience and Biotechnology, Tokyo, Japan, **4** Laboratory of Proteomics and Biomolecular Science, Research Support Center, Juntendo University Graduate School of Medicine, Tokyo, Japan, **5** Department of Radiation Oncology, Juntendo University Graduate School of Medicine, Tokyo, Japan, **6** Department of Next Generation Hematology Laboratory Medicine, Juntendo University Graduate School of Medicine, Tokyo, Japan

\* Current address: Department of Molecular Oncology, Kagoshima University Graduate School of Medical and Dental Sciences, Kagoshima, Japan

\* [tabe@juntendo.ac.jp](mailto:tabe@juntendo.ac.jp)

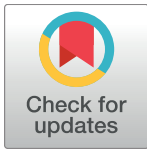

**OPEN ACCESS**

**Citation:** Sekihara K, Saitoh K, Yang H, Kawashima H, Kazuno S, Kikkawa M, et al. (2018) Low-dose ionizing radiation exposure represses the cell cycle and protein synthesis pathways in *in vitro* human primary keratinocytes and U937 cell lines. PLoS ONE 13(6): e0199117. <https://doi.org/10.1371/journal.pone.0199117>

**Editor:** Gayle E. Woloschak, Northwestern University Feinberg School of Medicine, UNITED STATES

**Received:** December 30, 2017

**Accepted:** June 3, 2018

**Published:** June 18, 2018

**Copyright:** © 2018 Sekihara et al. This is an open access article distributed under the terms of the [Creative Commons Attribution License](https://creativecommons.org/licenses/by/4.0/), which permits unrestricted use, distribution, and reproduction in any medium, provided the original author and source are credited.

**Data Availability Statement:** All relevant data are within the paper and its Supporting Information files.

**Funding:** This work was supported by the Foundation of Strategic Research Projects in Private Universities from the MEXT, Japan grant no. S1311011 to YT. The funder had no role in study design, data collection and analysis, decision to publish, or preparation of the manuscript.

## Abstract

The effects of the high-dose ionizing radiation used in radiotherapy have been thoroughly demonstrated *in vitro* and *in vivo*. However, the effects of low-dose ionizing radiation (LDIR) such as computed tomography-guided biopsies and X-ray fluoroscopy on skin cells remain controversial. This study investigated the molecular effects of LDIR on the human primary keratinocytes (HPKs) and U937 cells, monocytes-like cell lines. These cells were exposed to 0.1 Gray (Gy) X-ray as LDIR. The modulation of transcription was assessed using a cDNA array, and the protein expression after LDIR exposure was investigated using isobaric tags for relative and absolute quantification (iTRAQ) proteomic analysis at 24 hours. These effects were confirmed by immunoblotting analysis. The direct effects of LDIR on the U937 cells and HPKs and the bystander effects of irradiated HPKs on U937 cells were also investigated. LDIR downregulated c-Myc in both U937 cells and HPKs, and upregulated the p21<sup>WAF1/CIP1</sup> protein expression in U937 cells along with the activation of TGFβ and protein phosphatase 2A (PP2A). In HPKs, LDIR downregulated the mTOR signaling with repression of S6 and 4EBP1 activation. Similar changes were observed as bystander effects of LDIR. Our findings suggest that LDIR inhibits protein synthesis and induces the cytokines activation associated with inflammation via direct and bystander effects, which might recapitulate the effects of LDIR in inflamed skin structures.

**Competing interests:** The authors have declared that no competing interests exist.

## Introduction

Epidemiological and toxicological studies have examined the deleterious effects of radiation exposure in human health. High-dose ionizing radiation clearly causes harmful consequences for humans. By contrast, the risk of low-dose ionizing radiation (LDIR) is still unclear. The stochastic risk of LDIR (*i.e.*,  $<0.1$  Sv) is derived by extrapolation from data obtained for high-dose radiation exposure using a linear-no-threshold (LNT) model [1]. A recent epidemiological study demonstrated that the data from atomic bomb survivors supported the LNT model [2]. However, the health effects of LDIR exposure remain to be explored due to the confounding factors related to individual variability, life style, and genetic background [3, 4]. There is increasing concern regarding the health risks arising from LDIR exposure in medical diagnostics and radiation therapy. For example, computed tomography (CT) is a valuable diagnostic imaging technique, but its overuse raises concerns about the potential risks of iatrogenic cancers [5–7]. CT-guided interventional procedures result in greater dose exposure than a routine CT and have a higher risk [8][9].

In regard of the underlying mechanisms of LDIR's effects on skin structures, it was reported that LDIR promoted IL-12 production, dendritic cells migration [10], and skin-infiltrating monocytes/macrophages migration to draining lymph nodes [11]. Interestingly, ionizing radiation affects not only the directly irradiated cells but also non-irradiated neighboring cells. The phenomenon involving non-irradiated cells is known as the radiation-induced bystander effect (RIBE). Since Nagasawa and Little first reported the RIBE [12], several studies have detected this phenomenon [13–15]. However, little is still known about the effects of LDIR and RIBE on individual cells composing skin structures. In this study, we investigated the molecular effects of LDIR on *in vitro* human primary keratinocytes and U937 cell lines, monocyte-like histiocytic lymphoma cells. Coexistence of these cells may mimic a skin-infiltrating model to assess the contribution of monocytic cells to the release of inflammatory cytokines and the interactions between monocytic cells and irradiated neighboring skin cells.

## Materials and methods

### Cell cultures and reagents

U937 cells were purchased from the American Type Culture Collection (Rockville, MD, USA) and cultured in RPMI 1640 medium containing 1% penicillin-streptomycin with 10% fetal bovine serum. Human primary keratinocytes (HPKs) taken from new born (KK-4009, Kurabo Industries, Osaka, Japan) were cultured in HuMedia-KG2 medium (Kurabo) supplemented with recombinant human epidermal growth factor (0.1 ng/mL), recombinant human insulin (10  $\mu$ g/mL), hydrocortisone (0.67  $\mu$ g/mL), gentamicin (50  $\mu$ g/mL), amphotericin B (50 ng/mL) (Kurabo), and bovine pituitary extract (0.004 mg/mL) which has similar mitogenic activity with fetal bovine serum [16, 17]. HPKs at passage 3 were used for the experiments.

For LDIR exposure, the U937 cells and HPKs were irradiated with 0.1 Gy. All irradiation was performed with 4 MeV X-rays generated by a linear accelerator (Clinac21EX, Varian, Palo Alto, CA, USA) following full build-up (1 cm) at a dose rate of 2.0 Gy/min, as previously reported [18]. Cells were cultured for 24 hours after irradiation. For the bystander experiments, the culture medium of irradiated and sham-irradiated U937 cells and HPKs was extracted 24 hours after irradiation and incubated bystander cells with the extracted medium for another 24 hours and harvested them for gene expression or protein analyses. U937-(IR)-BS means U937 cells after 24 hour incubation with medium from irradiated HPKs, and HPK-(IR)-BS means HPKs after incubation with medium from irradiated U937 cells.

### cDNA microarray

Gene expression in the cells was determined by microarray analysis using the Affymetrix Human Gene 2.0 ST Array, according to the Affymetrix protocols (Santa Clara, CA, USA). Signal intensities were measured using a GeneChip Scanner3000 7G (Affymetrix) and converted to numerical data using the Affymetrix Expression Console software 1.3.1 (Affymetrix). To identify candidate genes of potential significance in U937, we applied a 1.2-fold change cutoff, since the combined responses of a group of genes acting in concert might affect the physiology of the cell, as previously described [19]. The digitized data were analyzed using GeneSpring GX 13.1.0 software (Agilent Technologies, Santa Clara, CA, USA). Genes whose expression changed significantly with treatment were subjected to functional analysis using Ingenuity Pathway Analysis software (IPA, Ingenuity Systems, QIAGEN, [www.qiagen.com/ingenuity](http://www.qiagen.com/ingenuity)) [20]. For IPA analyses, we used two scores: an 'enrichment' score (Fisher's exact test *P*-value) that measures the overlap of observed and predicted regulated gene sets, and a Z-score that assesses the match of observed and predicted upregulation/downregulation patterns [21]. The inclusion criteria for genes selected for the analysis was a fold change  $> \pm .8$  [22].

### isobaric tags for relative and absolute quantification (iTRAQ) sample labeling, mass spectrometry analysis, and peptide identification

Proteins in treated cells were identified using iTRAQ, a chemical labeling mass spectrometry (MS) method that was performed according to the manufacturer's protocol (AB SCIEX, Framingham, MA, USA) [23, 24]. Briefly, labeled peptides were analyzed using nano liquid chromatography in combination with tandem mass spectrometry (LC-MS/MS). Nano LC-MS was performed on a nano LC system (AB SCIEX) using a ChromXP C18-CL column (Eksigent, AB SCIEX, Dublin, CA, USA) and a TripleTOF 5600 mass spectrometer for MS/MS (AB SCIEX) with Analyst TF 1.7 software. Proteins were identified and quantified relatively using ProteinPilot ver. 5.0 software (AB SCIEX) [25]. The functions of the identified proteins were determined by searching the UniProt database (released on 01/20/2016). Protein ratios were normalized against the overall median ratio for all of the peptides in the sample for each separate ratio in every individual experiment. A confidence cut-off for protein identification of  $>95\%$  was applied. The proteins whose expression levels were changed by more than 1.6-fold after irradiation were defined as "profoundly modulated genes" as previously described [19], and the data were submitted to IPA [20].

### Immunoblot analysis

Cells were solubilized in lysis buffer comprising phosphate-buffered saline solution containing  $1\times$  cell lysis buffer (Cell Signaling Technology, Danvers, MA, USA),  $1\times$  protease inhibitor cocktail (Roche, Indianapolis, IN, USA), and  $1\times$  phosphatase inhibitor cocktail (Roche). The mixtures were incubated for 30 min on ice. The lysates were, then, centrifuged for 10 min at a speed of 13,000 rpm at  $4^{\circ}\text{C}$ . Total protein concentrations were determined using the Bio-Rad Protein Assay Kit (Bio-Rad, Hercules, CA, USA) according to the manufacturer's instructions. Total proteins (20  $\mu\text{g}$ ) were separated by sodium dodecyl sulfate-polyacrylamide gel electrophoresis (Bio-Rad) and transferred to polyvinylidene-fluoride membranes (0.45  $\mu\text{m}$ , Millipore, Bedford, MA, USA), and subsequently probed with first and second antibodies. The following antibodies were used:  $\alpha$ -tubulin (Sigma-Aldrich, St Louis, MO, USA), p21<sup>WAF1/CIP1</sup>, HIF1 $\alpha$  (BD Biosciences, San Jose, CA, USA), c-Myc, PP2A $\alpha$ , p-4EBP1, 4EBP-1, p-S6 ribosomal protein<sup>Ser235/Ser236</sup>, S6 ribosomal protein, p-p38 MAPK, p38 MAPK, and horseradish peroxidase-linked anti-mouse and anti-rabbit IgG (all from Cell Signaling Technology).

## Statistical analyses

Groups were compared using a two-tailed Student's *t*-test. A *P*-value  $\leq 0.05$  was considered statistically significant. Where indicated, the results are expressed as the mean  $\pm$  standard deviation (SD) of triplicate samples.

## Results

### LDIR induced gene expression changes in U937 cells

To investigate changes in gene expression caused by LDIR, we performed a cDNA microarray analysis of U937 cells that had been exposed to 0.1 Gy of X-rays in direct or bystander conditions, and then cultured for 24 hours. The cDNA microarray analysis showed that direct LDIR exposure increased expression of the *CARD9*, *HIST1H2BH*, and *mir4497* genes in U937 cells (U937-IR) ( $>1.8$ -fold change) while no genes showed decreased expression (S1 Table). *CARD9* is a member of the caspase recruitment domain (CARD) family, an upstream activator of BCL10 and NF- $\kappa$ B signaling that plays a regulatory role in cell apoptosis [26]. *HIST1H2BH* has no intron and encodes a member of the histone H2B family and plays roles in DNA repair and replication [27–29]. In U937-bystander [U937-(IR)-BS] cells, 24 genes were downregulated compared with the control cells, including *MT-TG*, *mir 4659*, *RAD51D*, *MT-TR*, *mir 4295*, *MT-TL2*, *mir 644A*, *mir 4521*, and *HIST1H4D* (S1 Table). *MT-TG*, *MT-TR*, and *MT-TL2* are transfer RNAs. *RAD51D*, a member of the RAD51 family, is involved in homologous recombination repair after DNA damage. No upregulated genes were detected in U937-(IR)-BS cells.

We, then, investigated the candidate upstream regulators that can be involved in the responses to LDIR in U937 cells. IPA analysis highlighted the activation of eight upstream factors in U937-IR cells, including TNF, CSF2, and IFNG. In U937-(IR)-BS cells, 10 upstream factors were activated including transforming growth factor beta 1 (TGF $\beta$ 1) ( $>1.8$ -fold change), and 21 were inhibited including hypoxia-inducible factor 1 alpha (HIF1 $\alpha$ ) (Table 1). The upregulation of TGF $\beta$  was concordant with the previous reports by us [30] and the others [31, 32].

To exclude the changes caused by the mix and match protocols in the medium transfer experiments, we confirmed that fully supplemented RPMI 1640 medium and HuMedia-KG2 medium caused no significant difference of cell viability after the LDIR directly or in the bystander condition by the trypan blue exclusion cell count method (data not shown).

### LDIR activated the cytokines associated with inflammatory pathways in U937 cells

We next investigated the changes in protein expression and molecular networks with LDIR in direct and bystander conditions of U937 cells using iTRAQ proteomic approach.

In U937-IR, 2276 unique proteins were identified including 61 proteins (28 upregulated and 33 downregulated) whose expression levels were significantly altered by the LDIR treatment. In U937-(IR)-BS cells, 1385 proteins were identified with 32 significantly altered proteins (13 upregulated, 19 downregulated) (S2 Table). We, then, examined the candidate upstream regulators and network interactions involved in the responses to LDIR in U937 cells. As shown in Table 2, IPA analyses highlighted the activation of the proliferation and differentiation modulator oncostatin M (OSM) in U937-IR and the inhibition of HIF1 $\alpha$  in U937-(IR)-BS cells. OSM is a member of the IL-6 family of cytokines that is associated with skin inflammation [33]. The network analyses further demonstrated the activation of protein phosphatase 2A (PP2A), a negative cell growth regulator, in U937-IR cells (S1A Fig). The immunoblot analyses confirmed the observation that LDIR increased PP2A $\alpha$  in both U937-IR and U937-(IR)-

**Table 1. Upstream factors involved in alterations of gene transcription caused by LDR in U937 cells (at 24 hours).**

| Upstream Regulator | Activation z-score | P-value  |
|--------------------|--------------------|----------|
| U937-IR            |                    |          |
| Activated          |                    |          |
| TNF                | 2.18               | 3.11E-01 |
| CSF2               | 2.13               | 2.31E-01 |
| IFNG               | 2.07               | 2.14E-01 |
| E2F3               | 1.98               | 2.29E-02 |
| Akt                | 1.97               | 8.86E-02 |
| IL5                | 1.96               | 1.49E-01 |
| IL1B               | 1.96               | 1.00E00  |
| IL1A               | 1.95               | 7.62E-02 |
| Inhibited          |                    |          |
| N.A.               |                    |          |
| U937-(IR)-BS       |                    |          |
| Activated          |                    |          |
| MGEA5              | 2.84               | 5.13E-01 |
| FSH                | 2.08               | 1.00E00  |
| SFTPA1             | 2.00               | 3.51E-01 |
| Nr1h               | 1.98               | 1.00E00  |
| SYVN1              | 1.98               | 3.32E-03 |
| MMP3               | 1.90               | 1.01E-02 |
| FLT1               | 1.89               | 2.62E-02 |
| AKT1               | 1.83               | 3.59E-01 |
| TGFB1              | 1.82               | 1.00E00  |
| KLF4               | 1.81               | 1.00E00  |
| Inhibited          |                    |          |
| REL                | -2.58              | 1.39E-01 |
| SMARCA4            | -2.56              | 4.78E-01 |
| IRF7               | -2.42              | 6.75E-02 |
| HIF1A              | -2.41              | 5.34E-01 |
| TNF                | -2.23              | 1.00E00  |
| TICAM1             | -2.22              | 1.00E00  |
| TNFRSF1A           | -2.22              | 1.00E00  |
| Ifn                | -2.19              | 5.22E-01 |
| NR1H4              | -2.18              | 1.00E00  |
| S100A9             | -2.16              | 3.22E-01 |
| PKD1               | -2.00              | 1.00E00  |
| HNF4A              | -1.99              | 1.01E-03 |
| IKBKG              | -1.98              | 5.52E-01 |
| CXCL12             | -1.94              | 1.31E-01 |
| CSF2               | -1.93              | 1.00E-01 |
| S100A8             | -1.92              | 3.89E-01 |
| IRF5               | -1.89              | 2.13E-02 |
| CST5               | -1.89              | 3.34E-02 |
| CXCR4              | -1.88              | 7.55E-02 |
| FOXO1              | -1.82              | 2.11E-01 |
| IFNG               | -1.82              | 1.00E00  |

Data were analyzed using Ingenuity Pathway Analysis (IPA) based on genes for which transcription was consistently altered after treatment in U937 cells.

<https://doi.org/10.1371/journal.pone.0199117.t001>

**Table 2. Upstream factors involved in the protein expression responses to LDIR in U937 cells and HPKs (at 24 hours).**

| Upstream Regulator | Activation z-score | p-value of overlap | Target molecules in dataset                                      |
|--------------------|--------------------|--------------------|------------------------------------------------------------------|
| U937-IR            |                    |                    |                                                                  |
| Activated          |                    |                    |                                                                  |
| OSM                | 1.63               | 4.15E-03           | ARHGEF2,GART,LRRFIP1,OGDH,PCNA,PGK1                              |
| Inhibited          |                    |                    |                                                                  |
| PRL                | -2.39              | 1.32E-04           | CTSD,MSN,P4HB,PCNA,RPSA,YWHAG                                    |
| EGFR               | -1.67              | 1.42E-05           | CCT5,HNRNPA2B1,HSPE1,IGBP1,PCNA,PPIA,PSMB1,TUBA4A                |
| U937-(IR)-BS       |                    |                    |                                                                  |
| Activated          |                    |                    |                                                                  |
| TP53               | 1.84               | 6.61E-03           | ACTN1,ARPC1B,EZR,HSPB1,PCNA,SFPQ,SOD1                            |
| Inhibited          |                    |                    |                                                                  |
| HIF1A              | -2.21              | 2.42E-05           | ALDOA,EIF5A,HSPA5,HSPB1,PGK1,PPIA                                |
| HPK-IR             |                    |                    |                                                                  |
| Activated          |                    |                    |                                                                  |
| FGF2               | 2.37               | 5.67E-05           | ALB, FLNA, ITGB1, PRKDC, THBS1, XRCC5, XRCC6                     |
| IL4                | 2.24               | 5.94E-03           | ANXA2, IDE, ITGB1, NCL, PRKDC, XRCC5, XRCC6                      |
| INSR               | 2.21               | 8.61E-05           | ACTN4, ATP5B, FH, HADHA, HSPD1, MDH2, RAB7A                      |
| IFNG               | 2.01               | 6.05E-02           | HSPD1, IDE, ITGB1, KRT14, LAMC2, PSME3, THBS1                    |
| ESRRA              | 1.95               | 1.34E-03           | ATP5B, HADHA, HK1, LDHA                                          |
| TNF                | 1.90               | 1.90E-02           | ALB,HSPD1,IDE,ITGB1,LAD1,LAMC2,LDHA,RPS3,THBS1,TPP2              |
| TP63               | 1.68               | 3.83E-03           | CAD,ITGB1,KRT14,KRT6A,THBS1                                      |
| PRL                | 1.62               | 9.94E-05           | ACTR3,ANXA2,HSPD1,IDE,KRT14,KRT5                                 |
| Inhibited          |                    |                    |                                                                  |
| CST5               | -2.00              | 6.95E-03           | AHNAK,ANXA2,HNRNPU,NCL                                           |
| CD3                | -1.67              | 1.21E-07           | ACTN4,ACTR3,HNRNPA1,KRT14,MDH2,NCL,NPM1,SF1,SSB,THBS1,XRCC6,YARS |
| CD28               | -1.63              | 3.52E-04           | ACTR3,HNRNPA1,NCL,SSB,THBS1,XRCC6                                |

Data were analyzed by Ingenuity Pathway Analysis (IPA) based on the proteins whose expression was consistently altered after the indicated treatment in U937 cells and HPKs (S2 Table).

<https://doi.org/10.1371/journal.pone.0199117.t002>

BS cells, which is consistent with the iTRAQ results (Fig 1A). PP2A is a family of serine/threonine phosphatases that negatively regulates mTOR signaling [34–36]. Because c-Myc is controlled by PP2A [37] and our cDNA microarray results indicated the LDR-induced activation of TGFβ signaling, another negative regulator of c-Myc [38, 39], we investigated the changes in the expression of c-Myc. As shown in Fig 1A, immunoblot analyses demonstrated that LDIR suppressed c-Myc protein levels in both U937-IR and U937-(IR)-BS cells. We also detected the downregulation of p21<sup>WAF1/CIP1</sup>, a negative downstream target of c-Myc [40, 41] that arrests cell cycle/growth in U937-IR cells. In addition, p38 MAPK, a downstream factor of TGF-β [42–44], was activated in both U937 and U937-BS cells after irradiation. Immunoblotting analyses confirmed the cDNA array findings (i.e., the downregulation of HIF1α in both U937-IR and U937-(IR)-BS cells (Fig 1A)). These results suggest that LDR plays a role in changing the various cytokine pathways via the activation of TGFβ and inactivation of OSM.

### Proteome analysis detected ribosomal biogenesis inhibition by LDIR in HPKs

In HPK-IR cells, 1551 unique proteins were identified including 58 proteins (22 upregulated and 36 downregulated) whose expression levels were significantly altered by LDIR treatment



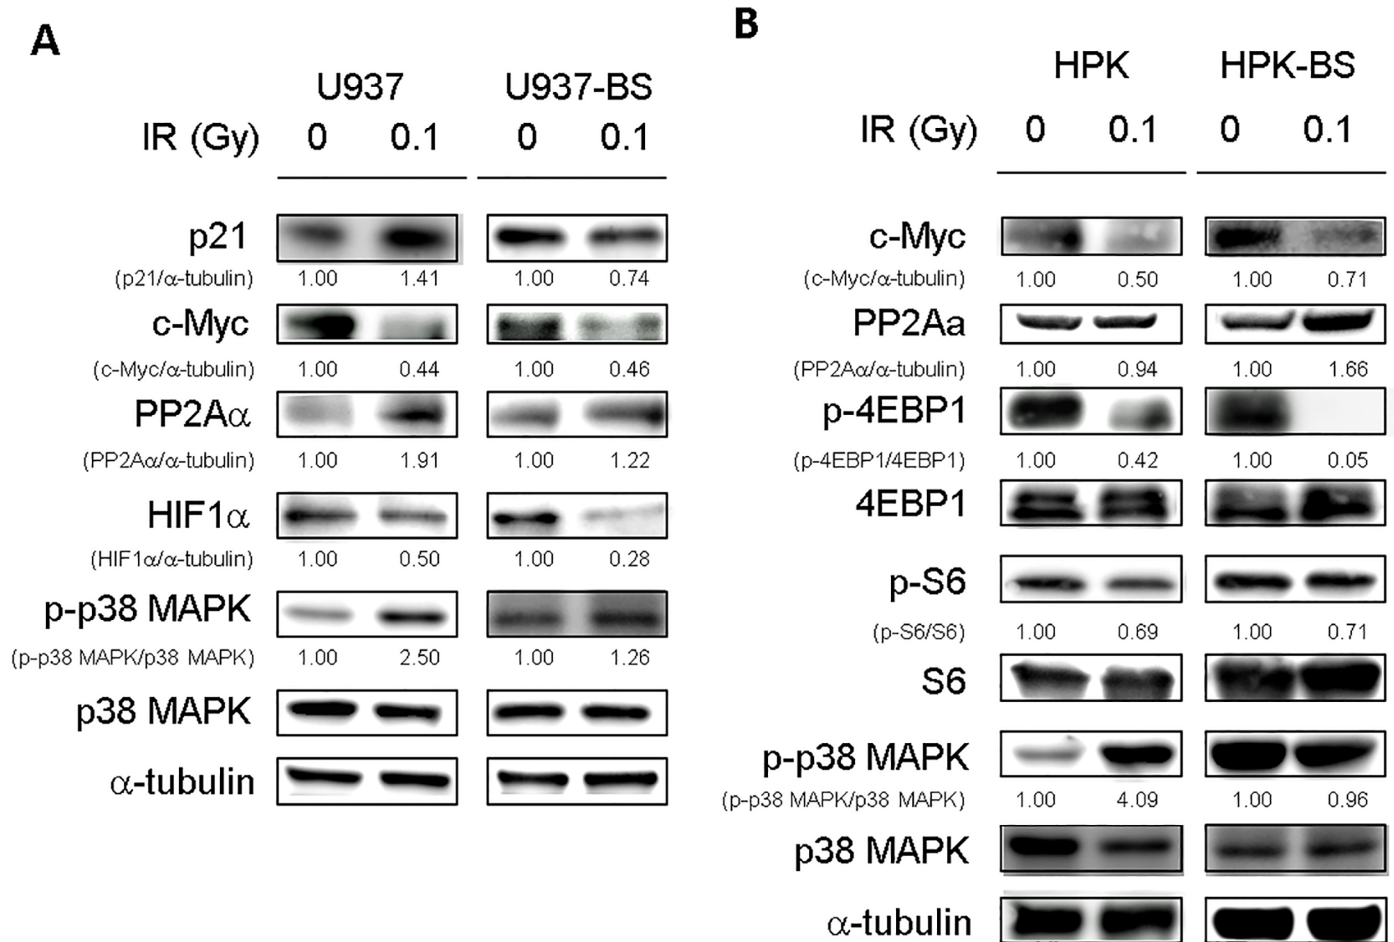

**Fig 1. Molecular pathways affected by LDIR in U937 cells and HPKs.** After direct LDIR for 24 hours or in the bystander condition, the cells were subjected to lysis and immunoblot analyses. The results are representative of three independent experiments, and the intensity of each immunoblot signal compared with that of  $\alpha$ -tubulin was quantified using ImageJ software; the quantity is shown directly under each blot.

<https://doi.org/10.1371/journal.pone.0199117.g001>

(S1 Table). In HPK-(IR)-BS cells, 1658 proteins were identified with 21 significantly altered proteins (3 upregulated and, 18 downregulated) proteins whose expression levels were significantly altered by LDIR treatment (S1 Table). The candidate upstream regulators and network interactions involved in the responses to LDIR in HPKs were examined by IPA, which highlighted the activation of the anti-inflammatory cytokine interleukin-4 (IL-4), tumor necrosis factor (TNF), and the tumor suppressor protein TP63 in LDIR -irradiated HPKs (HPK-IR) (Table 2). IL-4 promotes the activation of macrophages as M2 cells, which reduces inflammation [45]. TNF is a cytokine that can induce apoptosis and inflammation. TP63 is a member of the TP53 family. The network analyses further demonstrated the activation of heat shock protein 70 (HSP70) in HPK-IR cells (S1C Fig) and the downregulation of heat shock protein 90 (HSP90) and the proinflammatory cytokine high mobility group box 1 (HMGB1) [46–48] in HPK-(IR)-BS cells (S1D Fig). HSP70 and HSP90 are molecular chaperones that protect cells against damage to the proteome and assist in the refolding of denatured proteins and regulating degradation after severe protein damage [49] via mutual interaction [50]. Because IPA analyses indicated that LDIR irradiation upregulated TNF, we examined the activation of its downstream factor p38 MAPK [51], and found that LDIR irradiation increased

the expression of phospho-p38 MAPK in HPK-IR cells (Fig 1B). Since IPA analyses also indicated that LDIR irradiation repressed HSP90, the synthesis of which is regulated by mTOR [52], we further investigated the changes in mTOR signaling. We observed that LDIR irradiation suppressed the mTOR signaling along with decreased phospho-S6 and phospho-4EBP1 protein expression in both HPK-IR and HPK-(IR)-BS cells (Fig 1B). In addition, the expression of PP2A $\alpha$ , an upstream molecule of mTOR [34] and c-Myc controlled by PP2A $\alpha$  [37] were investigated. The immunoblotting demonstrated that LDIR increased the expression of PP2A in HPK-(IR)-BS cells and decreased the expression of c-Myc in HPK-IR and HPK-(IR)-BS cells (Fig 1B). PP2A inhibits c-Myc and mTOR signaling, including S6 and 4EBP1. Because mTOR signaling controls protein synthesis by inducing ribosome biogenesis and translation [53–55], these results indicate that LDIR irradiation suppresses ribosomal biogenesis via the upregulation of PP2A $\alpha$  and downregulation of c-Myc and mTOR signaling.

## Discussion

This study demonstrated several findings: (1) the U937 cells, mimicking skin-infiltrating monocytes, released inflammatory cytokines after LDIR; (2) the interactions between U937 cells and irradiated neighboring keratinocytes in LDIR exposure; and (3) LDIR also inhibited the ribosomal biogenesis in keratinocytes and U937 cells in *in vitro*.

After LDIR exposure, communication with sham-irradiated bystander cells via bioactive substances from irradiated cells modifies biological responses, and the RIBE can become saturated at relatively low doses of irradiation [56]. Furthermore, the RIBE of LDIR is as effective as direct irradiation [56–58]. It is known that TGF $\beta$  inhibits cell growth as a direct effect of irradiation as well as RIBE mediators [59, 60]. In this study, we demonstrated that direct LDIR irradiation and RIBE downregulated c-Myc, a negative downstream factor of TGF $\beta$ , both in U937 cells and HPKs. TGF $\beta$  and p21<sup>WAF1/CIP1</sup>, an activator of TGF $\beta$ , were upregulated in bystander U937 cells. Moreover, TNF- $\alpha$  is another important mediator of RIBE [61]. We detected that LDIR activated TNF $\alpha$  and p38 MAPK, which plays an essential role in RIBE [43, 62] via TNF $\alpha$  [63]. As a result, LDIR released inflammatory cytokines including TNF $\alpha$ , induced cell growth arrest via TGF $\beta$ /c-Myc/p21<sup>WAF1/CIP1</sup> pathways and caused RIBE through the activation of TGF $\beta$  and TNF $\alpha$ .

In addition to the above observations, we first found that LDIR increased PP2A, which negatively regulates the cell growth and inhibits c-Myc [64]. The downregulated c-Myc might upregulate p21<sup>WAF1/CIP1</sup> proteins. These facts suggest that LDIR might arrest cell growth via the PP2A/c-Myc/p21<sup>WAF1/CIP1</sup> pathways. We also detected that LDIR repressed S6 and 4EBP1 activation, as mTOR targets. It has been known that repression of mTOR signaling, in which PP2A possibly plays a role in inhibiting ribosomal biogenesis [65–67]. Therefore, LDIR could repress ribosomal biogenesis via PP2A/mTOR signaling pathway. We further observed that LDIR upregulated the OSM which is known to be associated with cell growth inhibition [68].

As the study limitations, this study investigated gene and protein expression at single time point using only two types of cell lines in *in vitro* culture. This study focused on the changes after 24 hours based on the previous reports that demonstrated the bystander effects on molecular pathways changed after 16–24 hours [69, 70]. Many studies have shown that gene and/or protein expression patterns are dependent on time after irradiation [30, 69, 71]. On the other hand, we previously demonstrated whereas proteomics data showed little overlapping responses observed at two post-radiation time points (i.e. 1 hour and 24 hours), the pathway analysis demonstrated the connections between the time points depending on LDIR conditions [30]. The further experiments at earlier or later time points are required to elucidate how much the molecular pathway changes dependent on time after irradiation. And *in vivo* studies



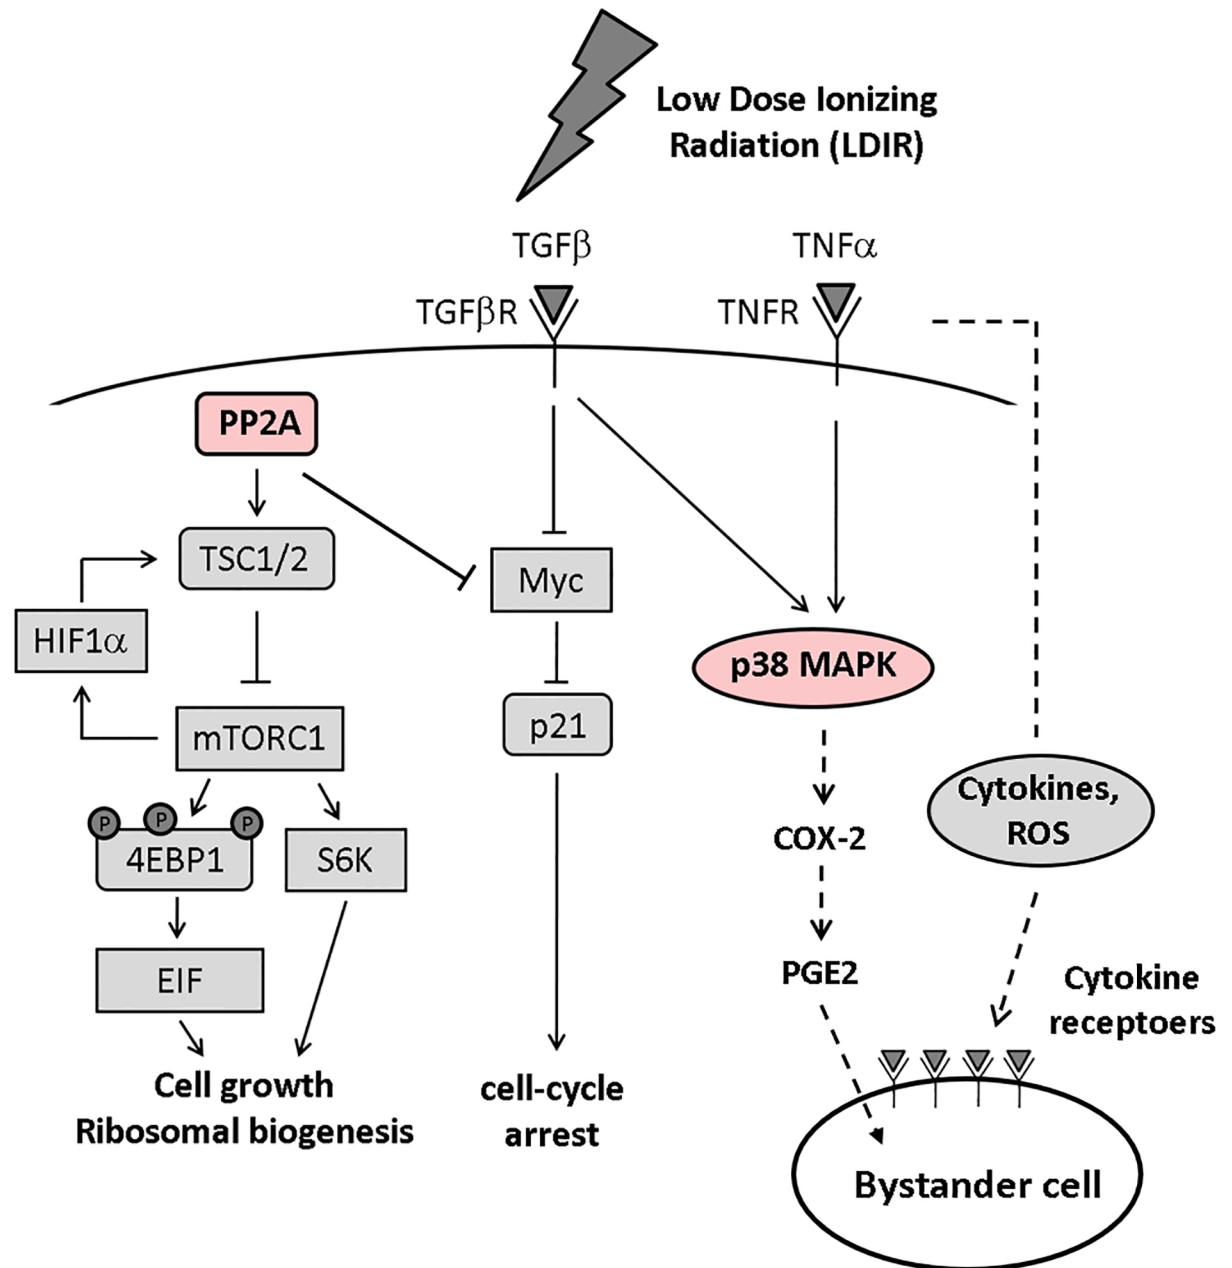

**Fig 2. LDIR inhibits cell growth and protein synthesis and induces bystander effects.** Cell signaling pathways affected by LDIR. LDIR downregulates c-Myc and upregulates p21<sup>WAF1/CIP1</sup> via stimulation of TGFβ and PP2A. PP2A also inhibits mTOR signaling with repression of S6K activation and 4EBP1 phosphorylation that resulted in decrease in protein synthesis. Furthermore, LDIR induces bystander effects through p38 MAPK activation. Directly-irradiated cells release cytokine signals that affect non-irradiated (bystander) cells.

<https://doi.org/10.1371/journal.pone.0199117.g002>

are warranted to validate our current observation and evaluate the LDIR effects. In addition, we used keratinocytes and monocytic cell lines (U937 cells) as the skin-infiltrating model in inflammation induced by LDIR which is different from actual human skin structures. Taken together, our findings indicate that LDIR affects cell cycle and protein synthesis pathways with activation of PP2A and p38 MAPK, in skin-infiltrating monocytic cells directly and indirectly via interactions with irradiated neighboring normal skin cells via bystander effects (Fig 2).

LDIR exposure, including iatrogenic exposure with diagnostic imaging, may cause molecular alterations associating with skin inflammation and proliferation in our skin-infiltrating model.

## Supporting information

**S1 Table. Genes with altered expression in U937 cells after 0.1 Gy X-ray irradiation.** Genes that showed a fold-change  $>1.7$  compared with controls are shown.  
(DOCX)

**S2 Table. Proteins with altered expression in U937 cells and HPKs after 0.1 Gy X-ray irradiation.** The protein expression levels in U937 cells and HPKs were detected by two independent iTRAQ experiments. The protein expression changes measured three times in each experiment. The expression of all proteins listed differed significantly ( $P < 0.05$ ) between controls and cells exposed to LDIR. Values indicate the fold-change relative to untreated cells. The confidence score (a percentage measure of the confidence of protein identification) for all proteins in the table was 99%.  
(DOCX)

**S1 Fig. Network of proteins involved in the responses of U937 cells and HPKs to LDIR.** Data were analyzed using IPA (QIAGEN, [www.qiagen.com/ingenuity](http://www.qiagen.com/ingenuity)). The IPA network analysis showed direct interactions between differentially expressed molecules in U937 cells and HPKs after the LDIR treatment directly or in the bystander condition. U937-IR cells; (B) U937-(IR)-BS cells; (C) HPK-IR cells; (D) HPK-(IR)-BS cells. Arrows indicate direct interactions between molecules. Lines represent direct (solid lines) and indirect (dashed lines) interactions between molecules. The network with the highest score is shown. Upregulated proteins in the dataset are depicted in pink and downregulated proteins in green. The depth of color indicates the degree of change [72].  
(TIF)

## Acknowledgments

We thank the Divisions of Molecular and Biochemical Research and Cell Biology, Juntendo University Graduate School of Medicine and Department of Radiation Oncology, Juntendo University Hospital, for use of facilities.

## Author Contributions

**Conceptualization:** Nobuhiro Hayashi, Keisuke Sasai, Yoko Tabe.

**Data curation:** Kazumasa Sekihara, Kaori Saitoh, Haeun Yang, Haruki Kawashima, Saiko Kazuno, Mika Kikkawa, Hajime Arai.

**Formal analysis:** Kazumasa Sekihara, Yoko Tabe.

**Funding acquisition:** Kazumasa Sekihara, Yoko Tabe.

**Investigation:** Kazumasa Sekihara, Kaori Saitoh, Haeun Yang, Haruki Kawashima, Saiko Kazuno, Mika Kikkawa, Hajime Arai.

**Methodology:** Kazumasa Sekihara, Yoko Tabe.

**Project administration:** Takashi Miida.

**Resources:** Takashi Miida.

**Supervision:** Yoko Tabe.

**Writing – original draft:** Kazumasa Sekihara, Yoko Tabe.

**Writing – review & editing:** Kazumasa Sekihara, Yoko Tabe.

## References

1. Sowby FD. International Commission on Radiological Protection: 1978 Stockholm meeting. *Radiology*. 1978; 129(2):533–5. Epub 1978/11/01. <https://doi.org/10.1148/129.2.533> PMID: 704874.
2. Ozasa K, Shimizu Y, Suyama A, Kasagi F, Soda M, Grant EJ, et al. Studies of the mortality of atomic bomb survivors, Report 14, 1950–2003: an overview of cancer and noncancer diseases. *Radiation research*. 2012; 177(3):229–43. Epub 2011/12/17. PMID: 22171960.
3. El-Saghire H, Michaux A, Thierens H, Baatout S. Low doses of ionizing radiation induce immune-stimulatory responses in isolated human primary monocytes. *International journal of molecular medicine*. 2013; 32(6):1407–14. Epub 2013/10/03. <https://doi.org/10.3892/ijmm.2013.1514> PMID: 24085242.
4. Pernot E, Hall J, Baatout S, Benotmane MA, Blanchardon E, Bouffler S, et al. Ionizing radiation biomarkers for potential use in epidemiological studies. *Mutation research*. 2012; 751(2):258–86. Epub 2012/06/09. <https://doi.org/10.1016/j.mrrev.2012.05.003> PMID: 22677531.
5. Hall EJ, Brenner DJ. Cancer risks from diagnostic radiology. *The British journal of radiology*. 2008; 81(965):362–78. Epub 2008/04/29. <https://doi.org/10.1259/bjr/01948454> PMID: 18440940.
6. Journy N, Rehel JL, Ducou Le Pointe H, Lee C, Brisse H, Chateil JF, et al. Are the studies on cancer risk from CT scans biased by indication? Elements of answer from a large-scale cohort study in France. *British journal of cancer*. 2015; 112(1):185–93. Epub 2014/10/15. <https://doi.org/10.1038/bjc.2014.526> PMID: 25314057.
7. Pearce MS, Salotti JA, Little MP, McHugh K, Lee C, Kim KP, et al. Radiation exposure from CT scans in childhood and subsequent risk of leukaemia and brain tumours: a retrospective cohort study. *Lancet (London, England)*. 2012; 380(9840):499–505. Epub 2012/06/12. [https://doi.org/10.1016/s0140-6736\(12\)60815-0](https://doi.org/10.1016/s0140-6736(12)60815-0) PMID: 22681860.
8. Leng S, Christner JA, Carlson SK, Jacobsen M, Vrieze TJ, Atwell TD, et al. Radiation dose levels for interventional CT procedures. *AJR American journal of roentgenology*. 2011; 197(1):W97–103. Epub 2011/06/28. <https://doi.org/10.2214/AJR.10.5057> PMID: 21701002.
9. McNitt-Gray MF. AAPM/RSNA Physics Tutorial for Residents: Topics in CT. Radiation dose in CT. *Radiographics: a review publication of the Radiological Society of North America, Inc*. 2002; 22(6):1541–53. Epub 2002/11/15. <https://doi.org/10.1148/rg.226025128> PMID: 12432127.
10. Yu N, Wang S, Song X, Gao L, Li W, Yu H, et al. Low-Dose Radiation Promotes Dendritic Cell Migration and IL-12 Production via the ATM/NF-KappaB Pathway. *Radiation research*. 2018; 189(4):409–17. Epub 2018/02/09. <https://doi.org/10.1667/RR14840.1> PMID: 29420126.
11. Toichi E, Lu KQ, Swick AR, McCormick TS, Cooper KD. Skin-infiltrating monocytes/macrophages migrate to draining lymph nodes and produce IL-10 after contact sensitizer exposure to UV-irradiated skin. *The Journal of investigative dermatology*. 2008; 128(11):2705–15. Epub 2008/05/30. <https://doi.org/10.1038/jid.2008.137> PMID: 18509360.
12. Nagasawa H, Little JB. Induction of sister chromatid exchanges by extremely low doses of alpha-particles. *Cancer research*. 1992; 52(22):6394–6. Epub 1992/11/15. PMID: 1423287.
13. Goldberg Z, Lehnert BE. Radiation-induced effects in unirradiated cells: a review and implications in cancer. *International journal of oncology*. 2002; 21(2):337–49. Epub 2002/07/16. PMID: 12118330.
14. Lorimore SA, Wright EG. Radiation-induced genomic instability and bystander effects: related inflammatory-type responses to radiation-induced stress and injury? A review. *International journal of radiation biology*. 2003; 79(1):15–25. Epub 2003/01/31. PMID: 12556327.
15. Mothersill C, Seymour C. Radiation-induced bystander effects: past history and future directions. *Radiation research*. 2001; 155(6):759–67. Epub 2001/05/16. PMID: 11352757.
16. Asami O, Nakamura T, Mura T, Ichihara A. Identification of trypsin inhibitor in bovine pituitary extracts as a survival factor for adult rat hepatocytes in primary culture. *Journal of biochemistry*. 1984; 95(2):299–309. Epub 1984/02/01. PMID: 6715300.
17. Kent KD, Bomser JA. Bovine pituitary extract provides remarkable protection against oxidative stress in human prostate epithelial cells. *In vitro cellular & developmental biology Animal*. 2003; 39(8–9):388–94. Epub 2003/12/24. [https://doi.org/10.1290/1543-706x\(2003\)039<0388:Bpeprp>2.0.Co;2](https://doi.org/10.1290/1543-706x(2003)039<0388:Bpeprp>2.0.Co;2) PMID: 14690452.
18. Sasai K, Shibamoto Y, Takahashi M, Zhou L, Hori H, Nagasawa H, et al. KIH-802, an acetohydroxamic acid derivative of 2-nitroimidazole, as a new potent hypoxic cell radiosensitizer: radiosensitizing activity,

- acute toxicity, and pharmacokinetics. *Cancer chemotherapy and pharmacology*. 1990; 26(2):112–6. Epub 1990/01/01. PMID: [2140730](#).
19. Taki K, Wang B, Nakajima T, Wu J, Ono T, Uehara Y, et al. Microarray analysis of differentially expressed genes in the kidneys and testes of mice after long-term irradiation with low-dose-rate gamma-rays. *Journal of radiation research*. 2009; 50(3):241–52. Epub 2009/04/29. PMID: [19398854](#).
  20. Tabe Y, Kojima K, Yamamoto S, Sekihara K, Matsushita H, Davis RE, et al. Ribosomal Biogenesis and Translational Flux Inhibition by the Selective Inhibitor of Nuclear Export (SINE) XPO1 Antagonist KPT-185. *PloS one*. 2015; 10(9):e0137210. Epub 2015/09/05. <https://doi.org/10.1371/journal.pone.0137210> PMID: [26340096](#).
  21. Kramer A, Green J, Pollard J Jr., Tugendreich S. *Causal analysis approaches in Ingenuity Pathway Analysis*. Bioinformatics (Oxford, England). 2014; 30(4):523–30. Epub 2013/12/18. <https://doi.org/10.1093/bioinformatics/btt703> PMID: [24336805](#).
  22. Sulkava M, Raitoharju E, Mennander A, Levula M, Seppala I, Lyytikainen LP, et al. Differentially expressed genes and canonical pathways in the ascending thoracic aortic aneurysm—The Tampere Vascular Study. *Scientific reports*. 2017; 7(1):12127. Epub 2017/09/25. <https://doi.org/10.1038/s41598-017-12421-4> PMID: [28935963](#).
  23. Glen A, Gan CS, Hamdy FC, Eaton CL, Cross SS, Catto JW, et al. iTRAQ-facilitated proteomic analysis of human prostate cancer cells identifies proteins associated with progression. *Journal of proteome research*. 2008; 7(3):897–907. Epub 2008/02/01. <https://doi.org/10.1021/pr070378x> PMID: [18232632](#).
  24. Herbrich SM, Cole RN, West KP Jr., Schulze K, Yager JD, Groopman JD, et al. Statistical inference from multiple iTRAQ experiments without using common reference standards. *Journal of proteome research*. 2013; 12(2):594–604. Epub 2012/12/29. <https://doi.org/10.1021/pr300624g> PMID: [23270375](#).
  25. Longworth J, Noirel J, Pandhal J, Wright PC, Vaidyanathan S. HILIC- and SCX-based quantitative proteomics of *Chlamydomonas reinhardtii* during nitrogen starvation induced lipid and carbohydrate accumulation. *Journal of proteome research*. 2012; 11(12):5959–71. Epub 2012/11/02. <https://doi.org/10.1021/pr300692t> PMID: [23113808](#).
  26. Bertin J, Guo Y, Wang L, Srinivasula SM, Jacobson MD, Poyet JL, et al. CARD9 is a novel caspase recruitment domain-containing protein that interacts with BCL10/CLAP and activates NF-kappa B. *The Journal of biological chemistry*. 2000; 275(52):41082–6. Epub 2000/10/29. <https://doi.org/10.1074/jbc.C000726200> PMID: [11053425](#).
  27. Albig W, Kioschis P, Poustka A, Meergans K, Doenecke D. Human histone gene organization: nonregular arrangement within a large cluster. *Genomics*. 1997; 40(2):314–22. Epub 1997/03/01. <https://doi.org/10.1006/geno.1996.4592> PMID: [9119399](#).
  28. Marzluff WF, Gongidi P, Woods KR, Jin J, Maltais LJ. The human and mouse replication-dependent histone genes. *Genomics*. 2002; 80(5):487–98. Epub 2002/11/01. PMID: [12408966](#).
  29. Ronningen T, Shah A, Oldenburg AR, Vekterud K, Delbarre E, Moskaug JO, et al. Prepatterning of differentiation-driven nuclear lamin A/C-associated chromatin domains by GlcNAcylated histone H2B. *Genome research*. 2015; 25(12):1825–35. Epub 2015/09/12. <https://doi.org/10.1101/gr.193748.115> PMID: [26359231](#).
  30. Tabe Y, Hatanaka Y, Nakashiro M, Sekihara K, Yamamoto S, Matsushita H, et al. Integrative genomic and proteomic analyses identifies glycerol-3-phosphate acyltransferase as a target of low-dose ionizing radiation in EBV infected-B cells. *International journal of radiation biology*. 2016; 92(1):24–34. Epub 2016/01/27. <https://doi.org/10.3109/09553002.2015.1106021> PMID: [26809544](#).
  31. Ewan KB, Henshall-Powell RL, Ravani SA, Pajares MJ, Arteaga C, Warters R, et al. Transforming growth factor-beta1 mediates cellular response to DNA damage in situ. *Cancer research*. 2002; 62(20):5627–31. Epub 2002/10/18. PMID: [12384514](#).
  32. Martin M, Vozenin MC, Gault N, Crechet F, Pfarr CM, Lefaix JL. Coactivation of AP-1 activity and TGF-beta1 gene expression in the stress response of normal skin cells to ionizing radiation. *Oncogene*. 1997; 15(8):981–9. Epub 1997/08/18. <https://doi.org/10.1038/sj.onc.1201433> PMID: [9285693](#).
  33. Boniface K, Diveu C, Morel F, Pedretti N, Froger J, Ravon E, et al. Oncostatin M secreted by skin infiltrating T lymphocytes is a potent keratinocyte activator involved in skin inflammation. *Journal of immunology (Baltimore, Md: 1950)*. 2007; 178(7):4615–22. Epub 2007/03/21. PMID: [17372020](#).
  34. Deldicque L, Theisen D, Francaux M. Regulation of mTOR by amino acids and resistance exercise in skeletal muscle. *European journal of applied physiology*. 2005; 94(1–2):1–10. Epub 2005/02/11. <https://doi.org/10.1007/s00421-004-1255-6> PMID: [15702344](#).
  35. Janssens V, Goris J. Protein phosphatase 2A: a highly regulated family of serine/threonine phosphatases implicated in cell growth and signalling. *The Biochemical journal*. 2001; 353(Pt 3):417–39. Epub 2001/02/15. PMID: [11171037](#).

36. Watt LF, Panicker N, Mannan A, Copeland B, Kahl RGS, Dun MD, et al. Functional importance of PP2A regulatory subunit loss in breast cancer. *Breast cancer research and treatment*. 2017; 166(1):117–31. Epub 2017/07/27. <https://doi.org/10.1007/s10549-017-4403-5> PMID: 28744751.
37. Yeh E, Cunningham M, Arnold H, Chasse D, Monteith T, Ivaldi G, et al. A signalling pathway controlling c-Myc degradation that impacts oncogenic transformation of human cells. *Nature cell biology*. 2004; 6(4):308–18. Epub 2004/03/30. <https://doi.org/10.1038/ncb1110> PMID: 15048125.
38. Datto MB, Li Y, Panus JF, Howe DJ, Xiong Y, Wang XF. Transforming growth factor beta induces the cyclin-dependent kinase inhibitor p21 through a p53-independent mechanism. *Proceedings of the National Academy of Sciences of the United States of America*. 1995; 92(12):5545–9. Epub 1995/06/06. PMID: 7777546.
39. Kubiczakova L, Sedlarikova L, Hajek R, Sevcikova S. TGF-beta—an excellent servant but a bad master. *Journal of translational medicine*. 2012; 10:183. Epub 2012/09/05. <https://doi.org/10.1186/1479-5876-10-183> PMID: 22943793.
40. Gartel AL, Shchors K. Mechanisms of c-myc-mediated transcriptional repression of growth arrest genes. *Experimental cell research*. 2003; 283(1):17–21. Epub 2003/02/05. PMID: 12565816.
41. Jung P, Hermeking H. The c-MYC-AP4-p21 cascade. *Cell cycle (Georgetown, Tex)*. 2009; 8(7):982–9. Epub 2009/03/10. <https://doi.org/10.4161/cc.8.7.7949> PMID: 19270520.
42. Bakin AV, Rinehart C, Tomlinson AK, Arteaga CL. p38 mitogen-activated protein kinase is required for TGFbeta-mediated fibroblastic transdifferentiation and cell migration. *Journal of cell science*. 2002; 115(Pt 15):3193–206. Epub 2002/07/16. PMID: 12118074.
43. Yu L, Hebert MC, Zhang YE. TGF-beta receptor-activated p38 MAP kinase mediates Smad-independent TGF-beta responses. *The EMBO journal*. 2002; 21(14):3749–59. Epub 2002/07/12. <https://doi.org/10.1093/emboj/cdf366> PMID: 12110587.
44. Zhang YE. Non-Smad pathways in TGF-beta signaling. *Cell research*. 2009; 19(1):128–39. Epub 2008/12/31. <https://doi.org/10.1038/cr.2008.328> PMID: 19114990.
45. Egawa M, Mukai K, Yoshikawa S, Iki M, Mukaida N, Kawano Y, et al. Inflammatory monocytes recruited to allergic skin acquire an anti-inflammatory M2 phenotype via basophil-derived interleukin-4. *Immunity*. 2013; 38(3):570–80. Epub 2013/02/26. <https://doi.org/10.1016/j.immuni.2012.11.014> PMID: 23434060.
46. Dumitriu IE, Baruah P, Valentinis B, Voll RE, Herrmann M, Nawroth PP, et al. Release of high mobility group box 1 by dendritic cells controls T cell activation via the receptor for advanced glycation end products. *Journal of immunology (Baltimore, Md: 1950)*. 2005; 174(12):7506–15. Epub 2005/06/10. PMID: 15944249.
47. Schaper F, Westra J, Bijl M. Recent developments in the role of high-mobility group box 1 in systemic lupus erythematosus. *Molecular medicine (Cambridge, Mass)*. 2014; 20:72–9. Epub 2014/02/18. <https://doi.org/10.2119/molmed.2014.00019> PMID: 24531837.
48. Wang H, Bloom O, Zhang M, Vishnubhakat JM, Ombrellino M, Che J, et al. HMG-1 as a late mediator of endotoxin lethality in mice. *Science (New York, NY)*. 1999; 285(5425):248–51. Epub 1999/07/10. PMID: 10398600.
49. Jaattela M. Escaping cell death: survival proteins in cancer. *Experimental cell research*. 1999; 248(1):30–43. Epub 1999/03/30. <https://doi.org/10.1006/excr.1999.4455> PMID: 10094811.
50. Murphy ME. The HSP70 family and cancer. *Carcinogenesis*. 2013; 34(6):1181–8. Epub 2013/04/09. <https://doi.org/10.1093/carcin/bgt111> PMID: 23563090.
51. Shivanna M, Rajashekhar G, Srinivas SP. Barrier dysfunction of the corneal endothelium in response to TNF-alpha: role of p38 MAP kinase. *Investigative ophthalmology & visual science*. 2010; 51(3):1575–82. Epub 2009/10/03. <https://doi.org/10.1167/iovs.09-4343> PMID: 19797215.
52. Chou SD, Prince T, Gong J, Calderwood SK. mTOR is essential for the proteotoxic stress response, HSF1 activation and heat shock protein synthesis. *PloS one*. 2012; 7(6):e39679. Epub 2012/07/07. <https://doi.org/10.1371/journal.pone.0039679> PMID: 22768106.
53. Li Y, Yue P, Deng X, Ueda T, Fukunaga R, Khuri FR, et al. Protein phosphatase 2A negatively regulates eukaryotic initiation factor 4E phosphorylation and eIF4F assembly through direct dephosphorylation of Mnk and eIF4E. *Neoplasia (New York, NY)*. 2010; 12(10):848–55. Epub 2010/10/12. PMID: 20927323.
54. Ma XM, Blenis J. Molecular mechanisms of mTOR-mediated translational control. *Nature reviews Molecular cell biology*. 2009; 10(5):307–18. Epub 2009/04/03. <https://doi.org/10.1038/nrm2672> PMID: 19339977.
55. Shimobayashi M, Hall MN. Making new contacts: the mTOR network in metabolism and signalling crosstalk. *Nature reviews Molecular cell biology*. 2014; 15(3):155–62. Epub 2014/02/22. <https://doi.org/10.1038/nrm3757> PMID: 24556838.
56. Prise KM, O'Sullivan JM. Radiation-induced bystander signalling in cancer therapy. *Nature reviews Cancer*. 2009; 9(5):351–60. Epub 2009/04/21. <https://doi.org/10.1038/nrc2603> PMID: 19377507.



57. Du S, Barcellos-Hoff MH. Tumors as organs: biologically augmenting radiation therapy by inhibiting transforming growth factor beta activity in carcinomas. *Seminars in radiation oncology*. 2013; 23(4):242–51. Epub 2013/09/10. <https://doi.org/10.1016/j.semradonc.2013.05.001> PMID: 24012338.
58. Prise KM, Belyakov OV, Folkard M, Michael BD. Studies of bystander effects in human fibroblasts using a charged particle microbeam. *International journal of radiation biology*. 1998; 74(6):793–8. Epub 1999/01/09. PMID: 9881726.
59. Shao C, Folkard M, Prise KM. Role of TGF-beta1 and nitric oxide in the bystander response of irradiated glioma cells. *Oncogene*. 2008; 27(4):434–40. Epub 2007/07/11. <https://doi.org/10.1038/sj.onc.1210653> PMID: 17621264.
60. Temme J, Bauer G. Low-dose gamma irradiation enhances superoxide anion production by nonirradiated cells through TGF-beta1-dependent bystander signaling. *Radiation research*. 2013; 179(4):422–32. Epub 2013/03/08. <https://doi.org/10.1667/RR3161.2> PMID: 23465059.
61. Shareef MM, Cui N, Burikhanov R, Gupta S, Satishkumar S, Shajahan S, et al. Role of tumor necrosis factor-alpha and TRAIL in high-dose radiation-induced bystander signaling in lung adenocarcinoma. *Cancer research*. 2007; 67(24):11811–20. Epub 2007/12/20. <https://doi.org/10.1158/0008-5472.CAN-07-0722> PMID: 18089811.
62. Hanafusa H, Ninomiya-Tsuji J, Masuyama N, Nishita M, Fujisawa J, Shibuya H, et al. Involvement of the p38 mitogen-activated protein kinase pathway in transforming growth factor-beta-induced gene expression. *The Journal of biological chemistry*. 1999; 274(38):27161–7. Epub 1999/09/10. PMID: 10480932.
63. Viemann D, Goebeler M, Schmid S, Klimmek K, Sorg C, Ludwig S, et al. Transcriptional profiling of IKK2/NF-kappa B- and p38 MAP kinase-dependent gene expression in TNF-alpha-stimulated primary human endothelial cells. *Blood*. 2004; 103(9):3365–73. Epub 2004/01/13. <https://doi.org/10.1182/blood-2003-09-3296> PMID: 14715628.
64. Arnold HK, Sears RC. Protein phosphatase 2A regulatory subunit B56alpha associates with c-myc and negatively regulates c-myc accumulation. *Molecular and cellular biology*. 2006; 26(7):2832–44. Epub 2006/03/16. <https://doi.org/10.1128/MCB.26.7.2832-2844.2006> PMID: 16537924.
65. Jastrzebski K, Hannan KM, Tchoubrieva EB, Hannan RD, Pearson RB. Coordinate regulation of ribosome biogenesis and function by the ribosomal protein S6 kinase, a key mediator of mTOR function. *Growth factors (Chur, Switzerland)*. 2007; 25(4):209–26. Epub 2007/12/20. <https://doi.org/10.1080/08977190701779101> PMID: 18092230.
66. Sekihara K, Saitoh K, Han L, Ciurea S, Yamamoto S, Kikkawa M, et al. Targeting mantle cell lymphoma metabolism and survival through simultaneous blockade of mTOR and nuclear transporter exportin-1. *Oncotarget*. 2017; 8(21):34552–64. Epub 2017/04/08. <https://doi.org/10.18632/oncotarget.16602> PMID: 28388555.
67. Tabe Y, Tafuri A, Sekihara K, Yang H, Konopleva M. Inhibition of mTOR kinase as a therapeutic target for acute myeloid leukemia. *Expert opinion on therapeutic targets*. 2017; 21(7):705–14. Epub 2017/05/26. <https://doi.org/10.1080/14728222.2017.1333600> PMID: 28537457.
68. Takashima S, Klagsbrun M. Inhibition of endothelial cell growth by macrophage-like U-937 cell-derived oncostatin M, leukemia inhibitory factor, and transforming growth factor beta1. *The Journal of biological chemistry*. 1996; 271(40):24901–6. Epub 1996/10/04. PMID: 8798767.
69. Asur R, Balasubramaniam M, Marples B, Thomas RA, Tucker JD. Bystander effects induced by chemicals and ionizing radiation: evaluation of changes in gene expression of downstream MAPK targets. *Mutagenesis*. 2010; 25(3):271–9. Epub 2010/02/05. <https://doi.org/10.1093/mutage/geq003> PMID: 20130020.
70. Lyng FM, Maguire P, McClean B, Seymour C, Mothersill C. The involvement of calcium and MAP kinase signaling pathways in the production of radiation-induced bystander effects. *Radiation research*. 2006; 165(4):400–9. Epub 2006/04/04. PMID: 16579652.
71. Klokov D, Leskov K, Araki S, Zou Y, Goetz EM, Luo X, et al. Low dose IR-induced IGF-1-sCLU expression: a p53-repressed expression cascade that interferes with TGFbeta1 signaling to confer a pro-survival bystander effect. *Oncogene*. 2013; 32(4):479–90. Epub 2012/03/07. <https://doi.org/10.1038/ncr.2012.64> PMID: 22391565.
72. Ghandhi SA, Ming L, Ivanov VN, Hei TK, Amundson SA. Regulation of early signaling and gene expression in the alpha-particle and bystander response of IMR-90 human fibroblasts. *BMC medical genomics*. 2010; 3:31. Epub 2010/07/31. <https://doi.org/10.1186/1755-8794-3-31> PMID: 20670442.
